# Supplementary material
Source: publisher figshare collection journal article supplement (https://frontiersin.figshare.com/ndownloader/files/16846799)
Supplement: Supplementary file [file 16846799]

## *Supplementary Material*

1 **Table S1.** Primers used in real-time PCR.

| Primer  | Sequence (5'–3')            | GenBank ID     |
|---------|-----------------------------|----------------|
|         | F: TGCTGTGTTCCCATCTATCG     |                |
| β-actin | R: TTGGTGACAATACCGTGTTCA    | NM_205518.1    |
|         | F: AGCCCAAGGTAAGGGTCTCG     |                |
| MHC II  | R: CGCCCGCTCAGGAACCACT      | NM001001762.1  |
|         | F: AACAGAAATGGTGGTAAGAT     |                |
| CD80    | R: TAGAAGCAAACCTGGTGA       | NM_001079739.1 |
|         | F: TGTGAAGACTGGGTAATAGG     |                |
| CD83    | R: AGGACAACAGCAGGAAGC       | XM_418929      |
|         | F: TTGCTACTTCCCAAACCTC      |                |
| CD86    | R: TCATCCACAATCCCTACA       | EF554724.1     |
|         | F: GCCCTCCTCCAGCCAGAAAG     |                |
| IL-1β   | R: TAGCCCTTGATGCCCAGTGC     | NM_204524.1    |
|         | F: TTCACCATCAGGCACGAC       |                |
| DEC205  | R: AAGGCGACTCTGGGACAC       | NM_001037836   |
|         | F: GCAGGACGAGATGTGCAA       |                |
| IL-6    | R: CCAGGTAGGTCTGAAAGGC      | AJ309540       |
|         | F: R ACCTCTTCAAGGGTGCACTCA  |                |
| IL-12   | R: ACCTCTTCAAGGGTGCACTCA    | AY262751       |
|         | F: ATCATACTGAGCCAGATTGTTTCG |                |
| IFN-γ   | R: TCTTTCACCTTCTTCACGCCAT   | Y07922         |
|         | F: GAAGCAGCGTTTGGGAGT       |                |
| TNF-α   | R: GTTGTGGGACAGGGTAGG       | NM_204267.1    |
|         | F: TGGCTCTTCTCCTGATCTCAATG  |                |
| CXCL1   | R: GCACTGGCATCGGAGTTCA      | Y14971         |

3 **Table S2.** Sequences and frequency of peptides

| Name | Sequence     | Frequency      |
|------|--------------|----------------|
| SP   | SPHLHTSSPWER | 16/114 (14.0%) |
| GD   | GDWPSLMHPRLE | 5/11 (4.4%)    |
| AP   | APSRTQINADYR | 5/114 (4.4%)   |
| TP   | TPPIRLTDSSAS | 4/114 (3.5%)   |

4

5

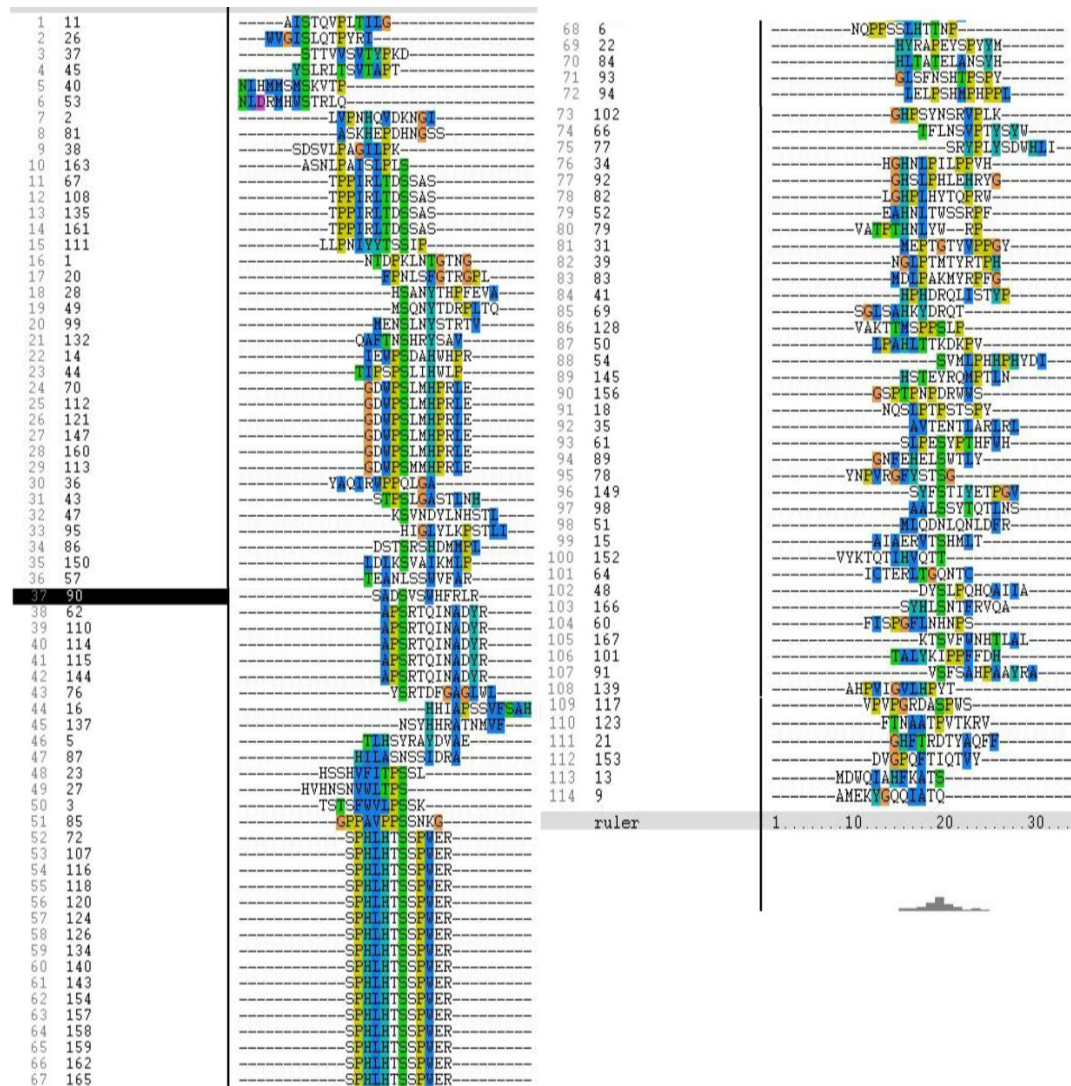

**Supplementary Figure 1.** Sequences of 12-mer peptides. After the fourth round of biopanning, individual phage-plaques were randomly selected and amplified separately. The nucleotide sequence of each phage was translated to its corresponding peptide sequence.

13

A

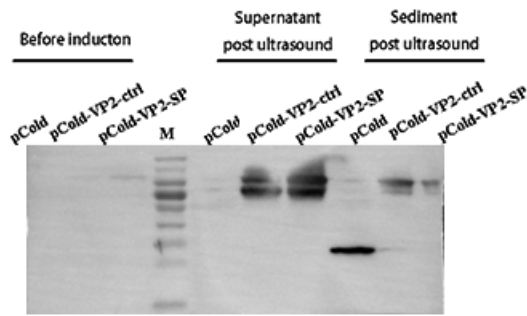

14

15

B

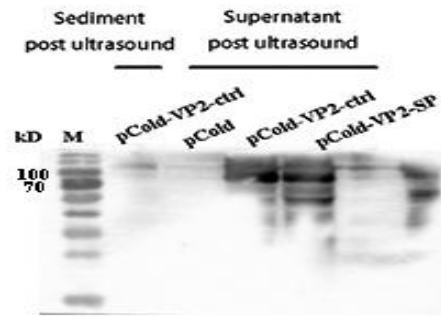

16

C

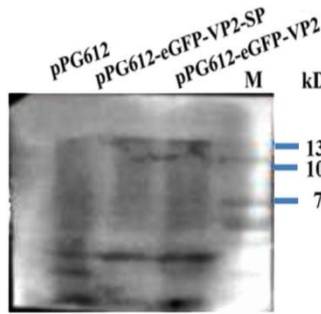

17

D

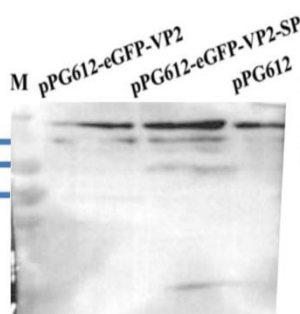

E

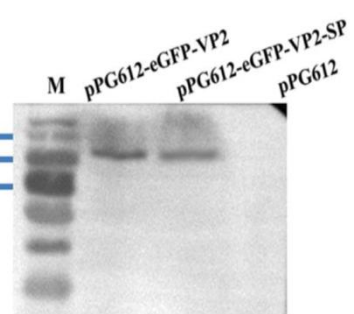

18 **Supplementary Figure 2.** Western blot. Identification of recombinant VP2 protein  
19 expressed in BL21 by western blot (A and B). Anti-His monoclonal antibody was  
20 used as the primary antibody (A). IBDV VP2 monoclonal antibody was used as the  
21 primary antibody (B). Identification of recombinant VP2 protein expressed in *L. sae*  
22 M-11 through western blotting (C, D and E). Anchor polyclonal antibody was used as  
23 the primary antibody (C). Anti-eGFP monoclonal antibody was used as the primary  
24 antibody (D). Anti-IBDV VP2 monoclonal antibody was used as the primary antibody  
25 (E).

26
